# Supplementary material
Source: publisher figshare collection journal article supplement (https://future-science-group.figshare.com/ndownloader/files/28169463)
Supplement: Supplementary file 1 [file 28169463]

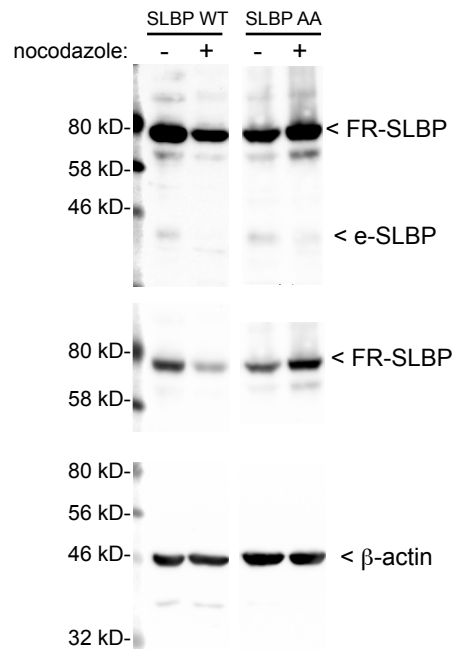

**Supplementary Figure 1: SLBP decreased stability in G2/M synchronized cells.** HeLa cell lines including SFFV-GPR-SLBP or SFFV-GPR-SLBPTTAA transgenes were treated with DMSO as control or nocodazole for 11 h. Western blot analysis of these cells with an antibody to SLBP shows a reduced amount of both endogenous SLBP in nocodazole treated cells (upper panel, long exposure) as well as FLAG-RFP-SLBP (middle panel short exposure). The positions of these two proteins are indicated on the right and the positions of the bands of a molecular marker on the left. The membrane was also probed with an antibody to  $\beta$ -actin to monitor loading (lower panel).
